1 **Title: A novel analytical decoder of BOLD signals for dissociating latent**  
2 **neurobehavioral processes**

3  
4 **Authors:** Shitong Xiang<sup>1,2†</sup>, Tianye Jia<sup>1,2,3,4†\*</sup>, Chao Xie<sup>1,2†</sup>, Zhichao Zhu<sup>1,2</sup>, Jujiao Kang<sup>1,2,7</sup>, Wei  
5 Cheng<sup>1,2</sup>, Gunter Schumann<sup>4,5</sup>, Trevor W. Robbins<sup>1,2,6\*</sup>, Jianfeng Feng<sup>1,2,7,8,9\*</sup>

6 **Affiliations:**

7 <sup>1</sup> Institute of Science and Technology for Brain-Inspired Intelligence, Fudan University, Shanghai,  
8 China.

9 <sup>2</sup> Key Laboratory of Computational Neuroscience and Brain-Inspired Intelligence (Fudan  
10 University), Ministry of Education, China;

11 <sup>3</sup> Centre for Population Neuroscience and Precision Medicine (PONS), Institute of Psychiatry,  
12 Psychology & Neuroscience, SGDP Centre, King's College London, United Kingdom, SE5 8AF;

13 <sup>4</sup> Centre for Population Neuroscience and Precision Medicine (PONS), Institute of Science and  
14 Technology for Brain-Inspired Intelligence, Fudan University, Shanghai, China.

15 <sup>5</sup> Centre for Population Neuroscience and Precision Medicine (PONS), Dept. of Psychiatry and  
16 Psychotherapy, CCM, Charite Universitaetsmedizin, Berlin, Germany.

17 <sup>6</sup> Department of Psychology and Behavioural and Clinical Neuroscience Institute, University of  
18 Cambridge, Cambridge, United Kingdom;

19 <sup>7</sup> Shanghai Center for Mathematical Sciences, Fudan University, Shanghai, China;

20 <sup>8</sup> Department of Computer Science, University of Warwick, Coventry, United Kingdom;

21 <sup>9</sup> School of Mathematical Sciences and Centre for Computational Systems Biology, Fudan  
22 University, Shanghai, China.

23

24 † These authors contributed equally to this work.

25 \* Correspondence authors.

26 Jianfeng Feng (Address: Institute of Science and Technology for Brain-inspired Intelligence, Fudan  
27 University, Shanghai, 200433, China. Email: [jianfeng64@gmail.com](mailto:jianfeng64@gmail.com))

28 or

29 Tianye Jia (Address: Institute of Science and Technology for Brain-inspired Intelligence, Fudan  
30 University, Shanghai, 200433, China. Email: [tianyejia@fudan.edu.cn](mailto:tianyejia@fudan.edu.cn))

31 or

32 Trevor W. Robbins (Address: Department of Psychology and Behavioural and Clinical  
33 Neuroscience Institute, University of Cambridge, Cambridge, United Kingdom. Email:

34 [twr2@cam.ac.uk](mailto:twr2@cam.ac.uk))

35 **Abstract:**

36 Brain, as a complex cognitive system, often processes multiple dimension  
37 information synchronously and integrate them to adapt dynamic environments and  
38 make effective decisions.<sup>1-3</sup> How to retrieve latent neurobehavioral processes from  
39 complex human neurobiological signals is an important yet previously unresolved  
40 challenge.<sup>4,5</sup> For instance, the previous literature has proposed two fundamental yet  
41 mutually confounded processes during the decision making and affective processing,  
42 i.e. valence and arousal.<sup>6,7</sup> Here, we develop a novel analytical approach, orthogonal-  
43 Decoding multi-Cognitive Processes (DeCoP), with which we dissociate neural  
44 responses in processing valence and arousal information during tests of motivational  
45 and emotional function. During reward/punishment anticipation, we decode brain-wide  
46 responses into spatially overlapping, yet functionally independent, evaluation and  
47 readiness networks, i.e., motivational valence and arousal processing, which are  
48 modulated differentially by the meso-limbic vs nigro-striatal dopamine systems.  
49 Similarly, during emotional reactivity, we decompose amygdala response into  
50 independent emotional valence and facial arousal processing features. We demonstrate  
51 that DeCoP can resolve paradoxically unexpected brain ‘inactivation’, and be applied  
52 more generally to decode multiple latent neurobehavioral processes. Furthermore, we  
53 anticipate our approach to advance both the design and hypothesis testing of cognitive  
54 experimental task paradigms.

55

56 **Main**

57 The brain frequently engages parallel processing involving different latent  
58 behavioural processes mediated by functionally distinct, though spatially over-lapping,  
59 neural networks. Previously, human functional neuroimaging studies have been  
60 unsuccessful in unravelling these processes from basal compound physiological signals.  
61 It is therefore challenging to build process-specific and mechanistic models of the brain  
62 or develop robust biomarkers for dysfunctional processes in psychiatric disorders.  
63 Recent overarching frameworks propose two different cognitive processes engaged in  
64 parallel during rewarded or punished behaviour, namely evaluation (i.e. valence  
65 processing, scaling signal values from reward to punishment) and response readiness  
66 (subsuming arousal and attentional salience, contributing to response preparatory  
67 processes) <sup>3,6</sup>. The evaluation process is essential for guiding upcoming action  
68 selections <sup>8</sup>, for which the brain has evolved dedicated regions/circuits for evaluating  
69 the value of actions <sup>9-12</sup>. Complementary to evaluation, both reward and punishment, as  
70 highly salient events, attract higher attention than neutral stimuli, also engaging greater  
71 levels of motor preparation and emotional arousal <sup>13-15</sup>, hence contributing to response  
72 (including motor) readiness. Therefore, evaluation and readiness signals are inevitably  
73 confounded with each other during reward/punishment processing. Unfortunately,  
74 decomposing this compound signal, for example in human fMRI studies, has proven  
75 challenging because independent components cannot be identified in many  
76 experimental test paradigms, although previous attempts have made to overcome this  
77 problem <sup>4,5,16</sup>. However, existing approaches have failed to disentangle signals in brain  
78 regions known to encode both evaluation and readiness signals, for example, in the  
79 striatum and the ventromedial prefrontal cortex (vmPFC) <sup>15</sup>, and have not provided  
80 convincing evidence to either prove or refute the assumption of independence of the  
81 signals. To resolve this complex theoretical issue, we developed a novel approach,  
82 orthogonal-Decoding multi-Cognitive Processes (DeCoP), which, for the first time,  
83 allows for a brain-wide decomposition of process-specific neurobiological  
84 representations of complex neurobehavioral processes. This technique has wide

85 application for decomposing compound neuroimaging signals, such as the BOLD  
86 response.

### 87 **Experiment and model designs of DeCoP**

88 A monetary incentive delay (MID) task (Fig. 1a), one of the classical and widely  
89 used fMRI paradigms for reward processing, was conducted in 1939 children aged 9-  
90 10 from the ABCD study (Extended Data Table. 1)<sup>17</sup> to assess reward/punishment  
91 processing with gain/loss conditions for small or large amounts of money and a neutral  
92 condition (i.e., -5.0 \$, -0.2 \$, 0, 0.2 \$ or 5.0 \$). Specifically, in the second-level analyses  
93 of the BOLD signal, based on these amounts, we defined plausible orthogonal contrasts  
94 [-2, -1, 0, 1, 2] and [2, 1, 0, 1, 2] that reflected putative independent hypothetical  
95 processes of evaluation and readiness, respectively (i.e. a large reward and a large  
96 punishment are assumed to be equally salient). Their complementary orthogonal  
97 contrasts (i.e., [-1, 2, 0, -2, 1] and [1, -2, 2, -2, 1]) could explain information not  
98 accounted for by the above hypothetical models (Fig. 1b). We were thus able to retrieve  
99 the decomposed signal components of those confounded processes (Extended Data Fig.  
100 1a, see Methods for more details).

### 101 **Decompose neural signals with DeCoP**

102 The vmPFC (Brodmann area [BA] 10-11; Peak MNI: [-9, 49, -9],  $t_{1938} = 15.69$ ,  
103 Cohen's  $D = 0.36$ ,  $p_{\text{uncorrected}} = 2.55\text{E-}52$ ) and ventral striatum (VS, Peak MNI: [7, 25, -  
104 3],  $t_{1938} = 14.21$ , Cohen's  $D = 0.32$ ,  $p_{\text{uncorrected}} = 1.14\text{E-}43$ ) were the most prominent  
105 regions identified in the evaluation model (Fig. 1c upper left&1d), thus being highly  
106 sensitive for tracking the entire dimension from punishment to reward. These areas  
107 coincide with the terminal regions of the dopamine neuron projections from the ventral  
108 tegmental area (VTA), i.e. the meso-corticolimbic dopamine system<sup>8,18,19</sup>. For the  
109 readiness model, however, the signals were more widely dispersed across cortical and  
110 subcortical areas, including motor-somatosensory, salience and attention networks, and  
111 regions such as the dorsal striatum (DS, Peak MNI: [0, 10, 4],  $t_{1938} = 32.80$ , Cohen's  $D$   
112  $= 0.75$ ,  $p_{\text{uncorrected}} = 4.56\text{E-}188$ ) and thalamus (THA, Peak MNI: [13, -6, 16],  $t_{1938} =$   
113  $24.66$ , Cohen's  $D = 0.56$ ,  $p_{\text{uncorrected}} = 5.23\text{E-}117$ ) (Fig. 1c upper right &1d), consistent

114 with their engagement in processing both reward and punishment<sup>20</sup>.

### 115 **Neural circuits for decomposed signals**

116 We then investigated whether the neural representations of evaluation and  
117 readiness signals were underpinned by different neural circuits, in particular those  
118 modulated putatively by the midbrain dopaminergic projections originating from either  
119 the substantia nigra pars compacta (SNc) or the VTA, which plays a central role in  
120 reward prediction and approach<sup>18,19</sup>. We found regions of the evaluation model with  
121 higher functional connectivity (FC) to VTA than to SNc (*paired t*-test:  $t_{183} = 14.84$ ,  
122 Cohen's  $D = 1.10$ ,  $p < 10E-32$ , Fig. 2a), and regions of the readiness model with higher  
123 FC to the SNc than to the VTA (*paired t*-test:  $t_{183} = 3.63$ , Cohen's  $D = 0.27$ ,  $p = 0.0004$ ,  
124 Fig. 2a) based on 7T high-resolution resting-state fMRI data from the Human  
125 Connectome Project (HCP)<sup>21</sup>. Further, we extracted the *t*-maps of the difference  
126 between the seed-based FC from VTA and SNc (i.e. 'VTA > SNc') (Extended Data Fig.  
127 2a-c), which was exhibited high similarities, although in opposite directions, with the  
128 *t*-maps of both evaluation ( $r = 0.22$ ,  $p_{adj} < 10E-20$ ) and readiness ( $r = -0.12$ ,  $p_{adj} < 10E-$   
129 12, Fig. 2b) models. Thus, the separate VTA and SNc dopamine projections could be  
130 the putative source of evaluation and readiness signals, respectively.

### 131 **Independence of decomposed neural signals**

132 We further demonstrated that the distinct underlying neural pathways of  
133 decomposed cognitive processes were indeed independent, which could be directly  
134 inferred from uncorrelated signal components in the proposed decoding procedure (see  
135 Methods for detailed proof). Based on our simulation results, only if the compound  
136 signals were indeed a combination of independent signals, the decomposed signals from  
137 DeCoP could be uncorrelated ( $|r_{\text{mean}}| < 0.001$ , the 'Independent' model in Extended Data  
138 Fig. 1b & Table 2). Otherwise, the decomposed signals were highly correlated and  
139 hence inseparable (the 'One Signal' model:  $r_{\text{mean}} = 0.54$ ; the 'Push and Pull' model:  
140  $r_{\text{mean}} = -0.45$ ; Extended Data Fig. 1b & Table 2). Thus, DeCoP also serves as an  
141 analytical tool for the statistical inference on the independence of decomposed signals.  
142 In this study, we found that the signals attributed to evaluation and N-shape models

143 (dependent signals:  $r_{\text{mean}} = -0.093$ ,  $p_{\text{bootstrap}} < 0.0001$  based on 10000 bootstrap; 32.06%  
144 voxels with  $r < -0.1$ ) together described the sensitivity of evaluation from punishment  
145 to reward. This was independent ( $|r_{\text{mean}}| < 0.01$ ,  $p_{\text{bootstrap}} > 0.3$ ; > 99% voxels with  $r \in [-$   
146  $0.1, 0.1]$ ) of those attributed to the readiness and W-shape models (dependent signals:  
147  $r_{\text{mean}} = -0.159$ ,  $p_{\text{bootstrap}} < 0.0001$ ; 93.29% voxels with  $r < -0.1$ ) that together described  
148 the differentiated engagement of readiness from the neutral condition to  
149 reward/punishment conditions (Fig. 2a&c; see Supplementary Information for more  
150 details). Hence, the observed unbalanced sensitivity towards reward and punishment  
151 could be parsed into two independent and balanced signal components, i.e. a point-  
152 symmetric evaluation process and a line-symmetric readiness process. Moreover, the  
153 paradoxical ‘inactive’ vmPFC during the large-win vs neutral contrast could now be  
154 understood as a product of a trade-off between two independent processes: activation  
155 by reward stimuli (i.e. of the evaluation process) and deactivation as part of the default  
156 mode network (i.e. of the readiness process).

### 157 **Complementary signal components from DeCoP**

158 On the other hand, the N-shape and W-shape models (Fig. 1c) account for the  
159 deviation from (or equivalently, they adjust) the shapes of the proposed evaluation and  
160 readiness models, particularly the response to small reward/punishment conditions (Fig.  
161 3c). This modification of the additional complementary orthogonal vectors also  
162 provided an effective measurement of distance between the latent pure signal and the  
163 proposed model (see Methods and Supplementary Information for more details).  
164 Therefore, converging evidence indicated that most brain regions, including VS and  
165 vmPFC, distinguish reward from punishment signals with their relative scales. In  
166 another word, the brain simplifies the scales of the different values when processing  
167 reward/punishment information, hence processing highly abstract information only.  
168 However, the bilateral anterior insula (aINS) and dorsal anterior cingulate cortex  
169 (dACC), commonly referred to as the salience network, were only sensitive to the large  
170 reward/punishment conditions, while the small reward/punishment and neutral  
171 conditions were undifferentiated, hence most likely tracking the parametric nature of

172 the experimental design (i.e. [-5, -0.2, 0, 0.2, 5] Extended Data Fig. 3&4 and Extended  
173 Data Table 3; see Supplementary Information for detailed analyses). These results were  
174 consistent with the role of aINS and dACC in updating and maintaining subjective value  
175 information.<sup>22,23</sup>

## 176 **Signal components affect task performance**

177 We further implemented a weighted voxel co-activation network analysis  
178 (WVCNA) on the ABCD MID task to capture the most informative brain-wide signal  
179 clusters<sup>24</sup> (see Supplementary Information for details) and identified 55 and 194  
180 clusters for the evaluation and readiness models, respectively (Extended Data Fig. 5-  
181 6& Supplementary Table 1). Again, we observed brain-wide low correlations between  
182 evaluation and readiness clusters ( $r_{\text{mean}} = 0.01$ ,  $p = 0.1621$ , > 99% pairwise  $r \in [-0.1, 0.1]$ ;  
183 Fig. 2b), hence further supporting their neural independence. We then investigated the  
184 effects of decomposed signals on task performance using canonical correlation analysis  
185 (CCA), and found associations between variations in the neural signal and task  
186 performance across three condition categories (i.e. reward, neutral and punishment) for  
187 both evaluation and readiness: accuracy (evaluation: adjusted  $\eta^2$  (adj- $\eta^2$ ) = 0.025,  $p_{\text{perm}}$   
188 < 0.001; readiness: adj- $\eta^2$  = 0.079,  $p_{\text{perm}}$  < 0.001) and reaction time (evaluation: adj- $\eta^2$   
189 = 0.020,  $p_{\text{perm}}$  < 0.001; readiness: adj- $\eta^2$  = 0.075,  $p_{\text{perm}}$  < 0.001) (Supplementary Table  
190 2&3). For the evaluation clusters, higher accuracy and faster reactions for both reward  
191 and punishment conditions (but not the neutral condition) were mainly associated with  
192 reduced sensitivity in left ventral striatum (VS), bilateral inferior temporal-occipital  
193 junctions (iTOJ), and in both sub- and pre-genual anterior cingulate cortices (sgACC  
194 and pgACC) (presented by the first components;  $r < -0.04$ , Supplementary Table 2&3,  
195 Extended Data Fig. 7a&b). For the readiness clusters, the executive regulation related  
196 to accuracy might function differently in the presence or absence of valence signals: in  
197 reward/punishment trials (represented by the first component), higher accuracy was  
198 associated with greater engagement of task-preparation regions, i.e. including the  
199 somatosensory-motor cortices and the dorsal attention network ( $r > 0.04$ ) but  
200 suppression of the salience network, i.e. the dorsal aINS and the dorsal ACC (dACC)



201 ( $r < -0.04$ ), whereas on neutral trials (represented by the second component) both  
202 relationships were reversed, with higher accuracy now being associated with  
203 suppressed task-preparation areas ( $r < -0.04$ ) and greater engagement of the salience  
204 network, i.e. the ventral aINS and dACC ( $r > 0.04$ , Supplementary Table 2&Extended  
205 Data Fig. 7c). Nevertheless, faster reactions were uniformly associated with greater  
206 engagement of task-preparation areas ( $r > 0.04$ ) and lesser engagement bilaterally of  
207 the anterior putamen (aPUT), left VS, dACC and the right frontoparietal network (FPN,  
208 i.e. dorsal lateral prefrontal cortex (DLPFC) and intra-parietal sulcus (IPS)) ( $r < -0.04$ )  
209 across all three conditions (represented by the first component, Supplementary Table  
210 3&Extended Data Fig. 7d; see Supplementary Information for more information).

### 211 **Decompose emotion processes with DeCoP**

212 To further demonstrate the broader applicability of this unified strategy for signal  
213 decomposition, we decoded another complex cognitive process, emotional face  
214 processing. Similarly to reward/punishment processing, emotional processing also  
215 involves compound signals of distinct behavioural processes such as affective valence,  
216 emotional arousal, and attention, especially in the amygdala<sup>25</sup>. To address this issue  
217 using the DeCoP method we analysed fMRI data for a modified emotional faces task  
218 performed in 1091 19-year-old adolescents from the IMAGEN project<sup>26</sup>. While the  
219 right amygdala was activated by all types of facial stimuli in the emotional faces task  
220 (Fig. 4a,  $t_{1090} > 13$ , Cohen's  $D > 0.39$ ), there was no significant difference in activations  
221 between the angry and neutral conditions (Fig. 4b upper right), consistent with previous  
222 studies<sup>27,28</sup>. Given the multidimensional role of the amygdala in several of the  
223 underlying processes it is conceivable that the emotional-decoding process-specific  
224 neural responses have been obscured by other processes, such as general processing of  
225 facial features. Again, we hypothesized that two dissociable components are involved  
226 in emotional processing, i.e. affective valence, corresponding to the neural  
227 representation of the affective facial emotion information (represent as [1, 0, -1] from  
228 angry to happy, Fig. 4c) and facial arousal, which was defined as the degree of  
229 excitement or motivational reaction when a person experienced and recognized an



230 emotional face (represent as [1, 0, 1], Fig. 4c). By applying DeCoP, we found an  
231 independent positive reaction to affective valence and negative reaction to facial arousal  
232 (Fig. 4c,  $r_{\text{mean}} = -0.041$ ,  $p_{\text{bootstrap}} = 0.1083$ ; 97.78% voxels with  $|r| < 0.1$ ). Hence, the  
233 right amygdala linearly tracked emotional valence on the happy through neutral to  
234 angry dimension, while the neutral faces attracted more attention (i.e. higher activation)  
235 than emotional ones. Therefore, both processes lead to an undifferentiated contrast for  
236 angry vs neutral faces.

### 237 **Conclusion**

238 In conclusion, we have developed and evaluated a universally applicable, novel  
239 signal decomposition strategy, 'DeCoP', to disentangle behavioural processes that  
240 confound the observation of functional neuroimaging signals. Through DeCoP we  
241 demonstrated the independence of evaluation and readiness processing in the brain,  
242 putatively modulated differentially by neural circuits targeting VTA and SNc; we also  
243 demonstrated that most brain regions, including the ventral striatum, coded signals  
244 based on abstract information instead of the observed exact values, except for the  
245 salience network, i.e. pgACC/dACC and aINS. Most importantly, we demonstrated that  
246 DeCoP could help to resolve common paradoxical observations in fMRI tasks which  
247 involve multiple interferential latent behavioural or cognitive processes, for example,  
248 the unexpectedly 'inactive' vmPFC in the contrast of large reward vs no reward, and  
249 the lack of differential amygdala activation in the contrast of angry vs neutral faces. We  
250 expect DeCoP can be applied usefully in many other comparably ambiguous data-sets.

251

252 **Main Reference**

- 253 1 Buschman, T. J. & Kastner, S. From Behavior to Neural Dynamics: An  
254 Integrated Theory of Attention. *Neuron* **88**, 127-144,  
255 doi:10.1016/j.neuron.2015.09.017 (2015).
- 256 2 Peixoto, D. *et al.* Decoding and perturbing decision states in real time. *Nature*  
257 **591**, 604-609, doi:10.1038/s41586-020-03181-9 (2021).
- 258 3 Fellows, L. K. The cognitive neuroscience of human decision making: a review  
259 and conceptual framework. *Behav Cogn Neurosci Rev* **3**, 159-172,  
260 doi:10.1177/1534582304273251 (2004).
- 261 4 Kahnt, T., Park, S. Q., Haynes, J. D. & Tobler, P. N. Disentangling neural  
262 representations of value and salience in the human brain. *Proc Natl Acad Sci U*  
263 *S A* **111**, 5000-5005, doi:10.1073/pnas.1320189111 (2014).
- 264 5 Zhang, Z. *et al.* Distributed neural representation of saliency controlled value  
265 and category during anticipation of rewards and punishments. *Nat Commun* **8**,  
266 1907, doi:10.1038/s41467-017-02080-4 (2017).
- 267 6 Zald, D. H. & Treadway, M. T. Reward Processing, Neuroeconomics, and  
268 Psychopathology. *Annual Review of Clinical Psychology* **13**, 471-495,  
269 doi:10.1146/annurev-clinpsy-032816-044957 (2017).
- 270 7 Kragel, P. A. & LaBar, K. S. Decoding the Nature of Emotion in the Brain.  
271 *Trends Cogn Sci* **20**, 444-455, doi:10.1016/j.tics.2016.03.011 (2016).
- 272 8 Lutz, K. & Widmer, M. What can the monetary incentive delay task tell us about  
273 the neural processing of reward and punishment? *Neuroscience and*  
274 *Neuroeconomics*, doi:10.2147/nan.S38864 (2014).
- 275 9 Juechems, K. *et al.* A Network for Computing Value Equilibrium in the Human  
276 Medial Prefrontal Cortex. *Neuron* **101**, 977-987 e973,  
277 doi:10.1016/j.neuron.2018.12.029 (2019).
- 278 10 Kennerley, S. W., Behrens, T. E. & Wallis, J. D. Double dissociation of value  
279 computations in orbitofrontal and anterior cingulate neurons. *Nat Neurosci* **14**,  
280 1581-1589, doi:10.1038/nn.2961 (2011).
- 281 11 Lebreton, M., Jorge, S., Michel, V., Thirion, B. & Pessiglione, M. An automatic  
282 valuation system in the human brain: evidence from functional neuroimaging.  
283 *Neuron* **64**, 431-439, doi:10.1016/j.neuron.2009.09.040 (2009).
- 284 12 Tom, S. M., Fox, C. R., Trepel, C. & Poldrack, R. A. The neural basis of loss  
285 aversion in decision-making under risk. *Science* **315**, 515-518,  
286 doi:10.1126/science.1134239 (2007).
- 287 13 Roesch, M. R. & Olson, C. R. Neuronal activity related to reward value and  
288 motivation in primate frontal cortex. *Science* **304**, 307-310,  
289 doi:10.1126/science.1093223 (2004).

- 290 14 Wunderlich, K., Rangel, A. & O'Doherty, J. P. Neural computations underlying  
291 action-based decision making in the human brain. *Proc Natl Acad Sci U S A* **106**,  
292 17199-17204, doi:10.1073/pnas.0901077106 (2009).
- 293 15 O'Doherty, J. P. The problem with value. *Neurosci Biobehav Rev* **43**, 259-268,  
294 doi:10.1016/j.neubiorev.2014.03.027 (2014).
- 295 16 Litt, A., Plassmann, H., Shiv, B. & Rangel, A. Dissociating valuation and  
296 saliency signals during decision-making. *Cereb Cortex* **21**, 95-102,  
297 doi:10.1093/cercor/bhq065 (2011).
- 298 17 Casey, B. J. *et al.* The Adolescent Brain Cognitive Development (ABCD) study:  
299 Imaging acquisition across 21 sites. *Dev Cogn Neurosci* **32**, 43-54,  
300 doi:10.1016/j.dcn.2018.03.001 (2018).
- 301 18 Krebs, R. M., Heipertz, D., Schuetze, H. & Duzel, E. Novelty increases the  
302 mesolimbic functional connectivity of the substantia nigra/ventral tegmental  
303 area (SN/VTA) during reward anticipation: Evidence from high-resolution  
304 fMRI. *NeuroImage* **58**, 647-655, doi:10.1016/j.neuroimage.2011.06.038 (2011).
- 305 19 Ferenczi, E. A. *et al.* Prefrontal cortical regulation of brainwide circuit dynamics  
306 and reward-related behavior. *Science* **351**, aac9698,  
307 doi:10.1126/science.aac9698 (2016).
- 308 20 Lake, J. I. *et al.* Reward anticipation and punishment anticipation are  
309 instantiated in the brain via opponent mechanisms. *Psychophysiology* **56**,  
310 e13381, doi:10.1111/psyp.13381 (2019).
- 311 21 Van Essen, D. C. *et al.* The Human Connectome Project: a data acquisition  
312 perspective. *Neuroimage* **62**, 2222-2231,  
313 doi:10.1016/j.neuroimage.2012.02.018 (2012).
- 314 22 Arulpragasam, A. R., Cooper, J. A., Nuutinen, M. R. & Treadway, M. T.  
315 Corticoinsular circuits encode subjective value expectation and violation for  
316 effortful goal-directed behavior. *Proc Natl Acad Sci U S A* **115**, E5233-E5242,  
317 doi:10.1073/pnas.1800444115 (2018).
- 318 23 Botvinick, M. M., Braver, T. S., Barch, D. M., Carter, C. S. & Cohen, J. D.  
319 Conflict monitoring and cognitive control. *Psychol Rev* **108**, 624-652,  
320 doi:10.1037/0033-295x.108.3.624 (2001).
- 321 24 Mumford, J. A. *et al.* Detecting network modules in fMRI time series: A  
322 weighted network analysis approach. *Neuroimage* **52**, 1465-1476,  
323 doi:10.1016/j.neuroimage.2010.05.047 (2010).
- 324 25 Simic, G. *et al.* Understanding Emotions: Origins and Roles of the Amygdala.  
325 *Biomolecules* **11**, doi:10.3390/biom11060823 (2021).
- 326 26 Schumann, G. *et al.* The IMAGEN study: reinforcement-related behaviour in  
327 normal brain function and psychopathology. *Mol Psychiatry* **15**, 1128-1139,

- 328           doi:10.1038/mp.2010.4 (2010).
- 329    27    Fusar-Poli, P. *et al.* Functional atlas of emotional faces processing: a voxel-  
330           based meta-analysis of 105 functional magnetic resonance imaging studies. *J*  
331           *Psychiatry Neurosci* **34**, 418-432 (2009).
- 332    28    Quinlan, E. B. *et al.* Psychosocial Stress and Brain Function in Adolescent  
333           Psychopathology. *Am J Psychiatry* **174**, 785-794,  
334           doi:10.1176/appi.ajp.2017.16040464 (2017).
- 335

336 **Figures**

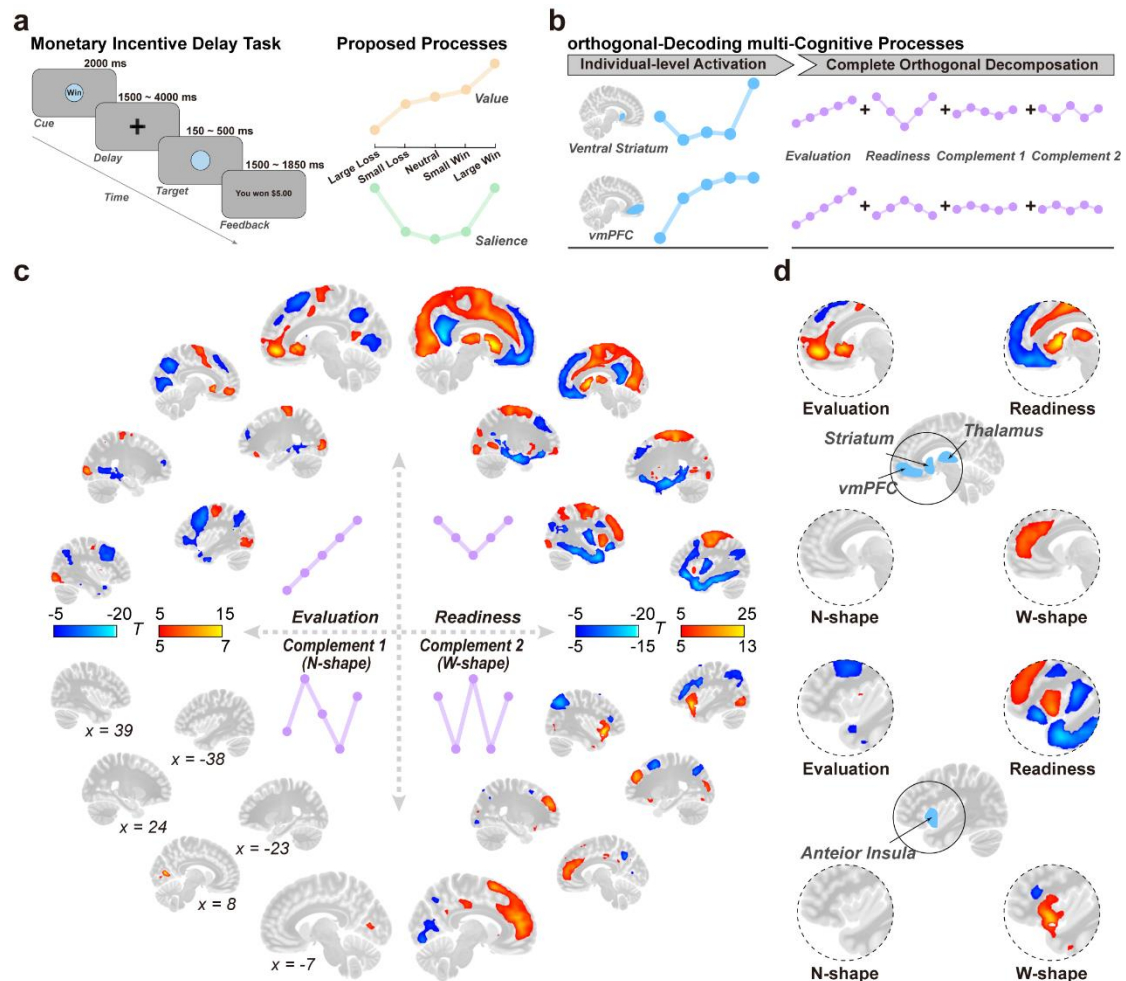

337

338 **Fig. 1. Experimental design and neural representations of the orthogonal**  
 339 **decomposition.** **a.** Procedure of the monetary incentive delay task (MID) and the  
 340 proposed evaluation and readiness cognitive processes; **b.** An illustration of  
 341 Orthogonally Decoding multi-Cognitive Processes (DeCoP); **c.** Brain-wide T-maps of  
 342 decomposed signals for orthogonal contrasts. Brain-wide significance was set as  $|T| > 5$ .  
 343 The MNI coordinates of brain slices were inserted at the lower left; **d.** Decomposed  
 344 signals in highlighted brain regions.

345

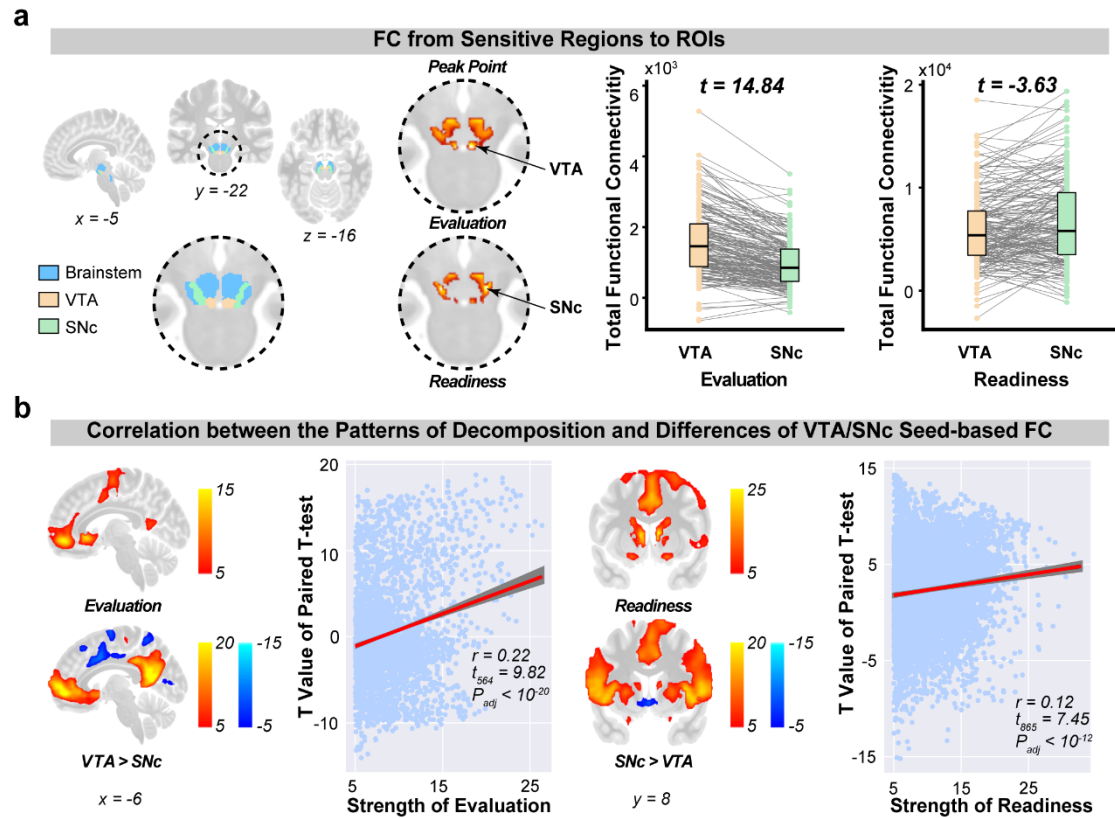

346

347 **Fig. 2 The decomposed evaluation and readiness processing targets VTA and SNc**

348 **neural circuits respectively. a.** Left: the masks of Brainstem, VTA and SNc were from

349 AAL3 atlas. Middle: strength of functional connectivities (FCs) to VTA and SNc from

350 the evaluation and readiness regions identified in Fig. 1. Right: Paired t-tests between

351 FCs to VTA and SNc from evaluation and readiness; **b.** Brain-wide pattern correlations

352 between the strength of decomposition signals (left: evaluation; right: readiness) and

353 the differences of seed-based FCs from VTA and SNc. Brain-wide significance was set

354 as  $|T| > 5$ .

355



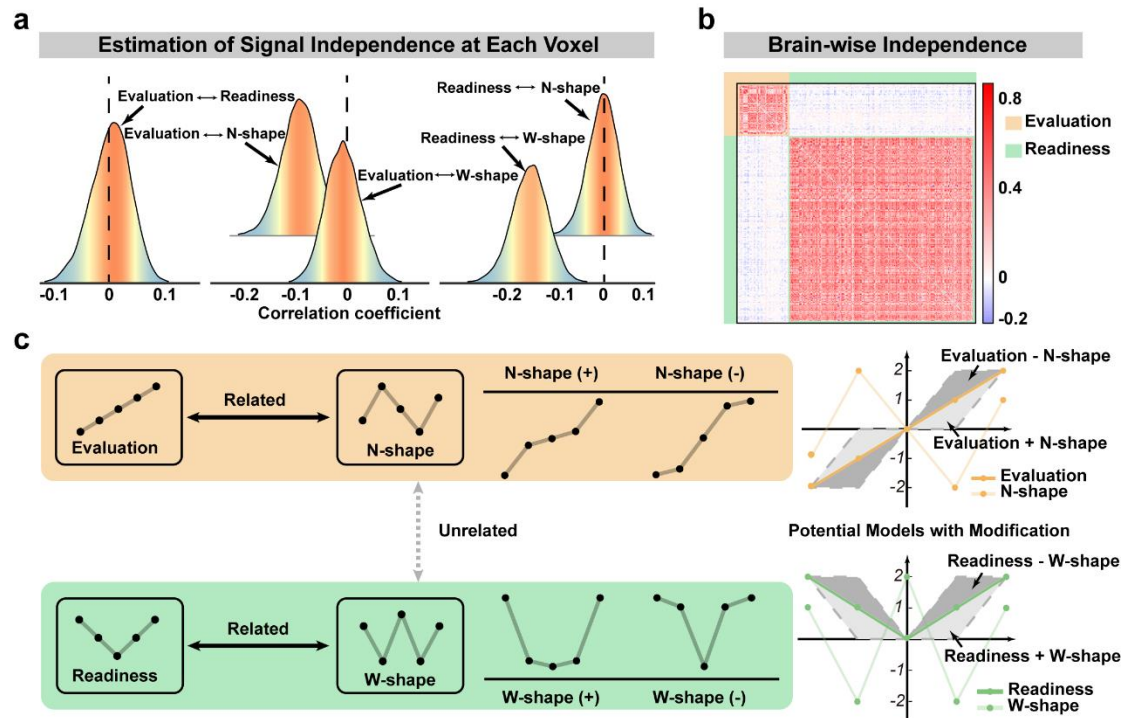

356

357

358 **Fig. 3 Inference for independence among orthogonally decomposed signals during**

359 **the reward anticipation. a.** The distributions of pair-wise correlations between signals

360 **of orthogonal contrasts at each voxel. Mean correlations deviated from 0 would indicate**

361 **a pair of related signals; b.** The correlation matrix of signals from the evaluation and

362 **readiness clusters identified by WVCNA. c.** An illustration of how related signals could

363 **describe the evaluation-related and readiness-related processing.**



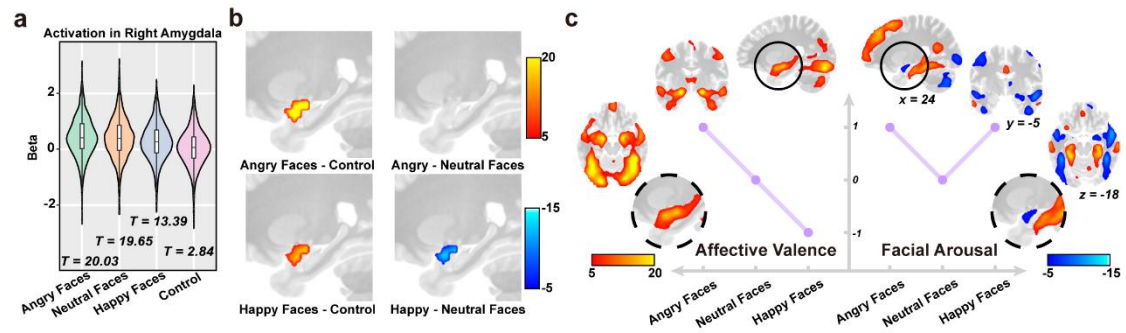

364

365

**Fig. 4 Decoding affective valence and facial arousal of emotional face processing**

366

**in amygdala by DeCoP. a.** BOLD signals of the right amygdala under different task

367

conditions. **b.** Activations of the right amygdala under different contrasts. **c.** The neural

368

representations of affective valence and facial arousal based on orthogonal

369

decompositions. Brain-wide significance was set as  $|T| > 5$ .

370

371 **Methods**

372 **Participants**

373 The dataset used for this study was selected from Annual Curated Data Release  
374 2.01 (<https://data-archive.nimh.nih.gov/abcd>) of the Adolescent Brain Cognitive  
375 Development (ABCD) cohort, which recruited 11,875 children between 9–11 years of  
376 age from 21 sites across the United States<sup>17</sup>. The study conforms to each site's  
377 Institutional Review Board's rules and procedures, and all participants provide  
378 informed consent (parents) or informed assent (children). More details of the subjects  
379 and the data collection are provided at the ABCD website  
380 (<https://abcdstudy.org/scientists/protocols>) and are also described previously<sup>17</sup>.

381 Magnetic resonance imaging (MRI) data in the ABCD study were collected from  
382 different 3T scanner platforms (i.e. Siemens Prisma, General Electric (GE) MR750 and  
383 Philips Achieva dStream). To minimize biases introduced by multiple platforms, we  
384 only included MRI data from the most frequent manufacturer Siemens Prisma, i.e. 5968  
385 participants from 13 sites. By examining the similarity of brain activations across these  
386 13 sites, we selected 2326 participants from 4 sites with consistent activation patterns.  
387 Furthermore, the data with poor registration (by visual check) and high head motion  
388 (mean framework displacement (FD) > 0.5 mm) were excluded. Hence, 1939 quality-  
389 controlled participants were included in the following analysis and the demographic  
390 characteristics of these participants are summarized in Extended Data Table 1.

391 **Monetary incentive delay (MID) task design**

392 A modified version of the MID task was used to examine brain activation during  
393 monetary reward anticipation and receipt<sup>29</sup>, which consists of five levels of incentive:  
394 large loss, small loss, neutral, small win and large win (i.e., -5.0 \$, -0.2 \$, 0\$, 0.2 \$ and  
395 5.0\$ respectively). In each trial, participants were first presented with one of three cue  
396 shapes (circle, square or triangle) that indicated the trial condition (of win, loss, or  
397 neutral, respectively), as well as the amount of money involved. This cue presentation  
398 (2,000 ms) was followed by a jittered anticipatory delay (1,500-4,000 ms) of fixation  
399 on a black crosshair. Subsequently, a blank target cue (with the same shape as the

400 previously presented cue) emerged and required the participants to press a response  
401 button before the target disappeared to win or avoid loss. With a tracking algorithm, the  
402 time of the target on the screen was dynamically manipulated (i.e., 150 ms-500 ms) to  
403 maintain a 60% success rate for each participant. After a short delay, feedback of the  
404 current trial (i.e., the amount of monetary gain or loss) and the accumulated reward so  
405 far were presented for 1,500-1,850 ms (Fig. 1A). During the anticipation phase,  
406 participants underwent 50 trials in total (i.e., 10 trials per incentive degree). Participants  
407 had first completed a practice session outside the scanner before completing two  
408 sessions of the MID task with fMRI recording (approximately 5.5 minutes each).

### 409 **Image acquisition and preprocessing**

410 Imaging protocols were harmonized across sites and scanners. 3-dimensional T1-  
411 weighted images (1.0 mm isotropic, TR = 2500 ms, TE = 2.88 ms) were acquired with  
412 a gradient-echo sequence for anatomical localization and high spatial (2.4 mm isotropic)  
413 and temporal (TR = 800 ms) resolution MID-task-based fMRI was acquired with echo-  
414 planar imaging (EPI) sequence in two separate runs (approximately 5.5 minutes each).  
415 The detailed MRI acquisition protocol is described elsewhere<sup>17</sup>. All functional images  
416 were preprocessed with the same preprocessing procedure by suggested protocols from  
417 FMRIB's Software Library (FSL v5.0.9), Advanced Normalization Tools (ANTs v1.9.2)  
418 and Analysis of Functional NeuroImages (AFNI v18.3.03). Concretely, the whole  
419 preprocessing procedure included the following steps: (i) brain extraction (ANTs  
420 antsBrainExtraction), nonlinear registration to MNI space (ANTs antsRegistrationSyN)  
421 for structural images; (ii) rigid realignment to adjust for motion (FSL MCFLIRT) and  
422 field map correction (FSL TOPUP) for functional images; (iii) co-registration to a high-  
423 resolution T1 image and normalization to 3 mm isotropic MNI standard space (ANTs  
424 antsRegistrationSyN) and (iv) spatial smoothing with a 6mm full-width at half-  
425 maximum (FWHM) Gaussian kernel (AFNI 3dBlurToFWHM) and detrending (AFNI  
426 3dDetrend).

### 427 **First-level analysis of task-based fMRI**

428 At the first-level analysis, we set up a general linear model to estimate the effects  
429 of the task conditions at the individual level with SPM, which contained 20 task  
430 condition regressors (i.e. Target (Hit or Miss) \* Phases (Anticipation, Feedback) \* Task  
431 Conditions (Large-Loss, Small-Loss, Neutral, Small-Win or Large-Win)) and  
432 additional covariate regressors (i.e., 24 motion-related parameters: 6 rigid-body motion  
433 parameters, their first temporal derivatives and 12 corresponding squared items; and  
434 mean signals of both white matter and ventricles). All regressors were convolved with  
435 a double-gamma HRF, and no orthogonalization of regressors was applied. For BOLD  
436 signals, drift was modeled with the DCT basis, and a cut-off of 128 s was applied (SPM  
437 defaults). Finally, the autocorrelation was modeled as a global approximate AR(1) in  
438 SPM.

### 439 **Orthogonally Decoding multi-Cognitive Processes**

440 In the present study, we propose a novel approach to decompose each participant's  
441 brain activations at varied conditions (denoted as  $y$ ) with a set of orthogonal basis  
442  $\mathbf{x} = (x_1, \dots, x_k)$ , where each vector could represent a predefined signal model, e.g.  
443 evaluation or readiness. Specifically, 'orthogonal' here means that the pairwise  
444 covariances of vectors were all zero, i.e.  $Cov(x_i, x_j) = E(x_i, x_j) - E(x_i)E(x_j) = 0$ .  
445 In this way, the regression coefficients  $\boldsymbol{\beta} = (\beta_1, \dots, \beta_k)$  (i.e. the strength of signals for  
446 each individual) estimated from a multiple linear model with all vectors were the same  
447 as those estimated univariately (of simple linear models), i.e.  
448  $T(\beta_i | y, \mathbf{x}, \boldsymbol{\beta}_{-i}) = T(\beta_i | y, x_i)$ , where  $T(\cdot)$  stands for the best linear unbiased  
449 estimator.

450 We propose that the above individual level orthogonal disconfounding eliminates  
451 spurious correlations of signal components (i.e.  $\beta$ ) introduced by related vectors (i.e.  $X_i$   
452 are correlated), thus allowing us to make meaningful inferences regarding signal  
453 independence at the population level. Here, we only describe a simple proof for the  
454 purpose of illustration, where only two orthogonal vectors were involved. Let  $y_i$  denote  
455 the activations of the  $i$ th individual across all conditions, and  $x_{1i}$  and  $x_{2i}$  denote the two

456 predefined independent orthogonal models of input signals, where  $Cov(x_{1i}, x_{2i}) = 0$ ,  
 457 and  $\beta_{1i}$  and  $\beta_{2i}$  denotes the corresponding regression coefficients, i.e. the signal  
 458 strengths. We have the following linear model:

$$459 \quad y_i = \beta_{1i}x_{1i} + \beta_{2i}x_{2i} + \varepsilon. \quad (1)$$

460 We first show that orthogonal settings of  $x_{1i}$  and  $x_{2i}$  are necessary for a meaningful  
 461 signal decomposition. The covariance and variance conditional on  $x_{2i}$  are easily derived.

$$462 \quad Cov(x_{1i}, y_i | x_{2i}) = Cov(x_{1i}, y_i) - \frac{Cov(x_{1i}, x_{2i}) \cdot Cov(y_i, x_{2i})}{Var(x_{2i})}$$

463 and

$$464 \quad Var(x_{1i} | x_{2i}) = Var(x_{1i}) - \frac{Cov(x_{1i}, x_{2i})^2}{Var(x_{2i})}.$$

465 Similar results are easily acquired for the covariance/variance conditional on  $x_{1i}$ .

466 Therefore, we establish the following relationship between the least square estimations  
 467 (LSEs) of  $\beta_{1i}$  and  $\beta_{2i}$ :

$$\begin{aligned} & \frac{Cov(x_{1i}, y_i)}{Var(x_{1i})} - \beta_{1i} \\ &= \frac{Cov(x_{1i}, y_i)}{Var(x_{1i})} - \frac{Cov(x_{1i}, y_i | x_{2i})}{Var(x_{1i} | x_{2i})} \\ &= \frac{Cov(x_{1i}, y_i)}{Var(x_{1i})} - \frac{Cov(x_{1i}, y_i) - \frac{Cov(x_{1i}, x_{2i}) \cdot Cov(x_{2i}, y_i)}{Var(x_{2i})}}{Var(x_{1i}) - \frac{Cov(x_{1i}, x_{2i})^2}{Var(x_{2i})}} \\ &= \frac{Cov(x_{1i}, x_{2i}) \cdot Cov(x_{2i}, y_i) \cdot Var(x_{1i}) - Cov(x_{1i}, y_i) \cdot Cov(x_{1i}, x_{2i})^2}{Var(x_{1i})^2 \cdot Var(x_{2i}) - Var(x_{1i}) \cdot Cov(x_{1i}, x_{2i})^2} \\ &= \frac{Cov(x_{1i}, x_{2i})}{Var(x_{1i})} \cdot \frac{Cov(x_{2i}, y_i) - \frac{Cov(x_{1i}, x_{2i}) \cdot Cov(x_{1i}, y_i)}{Var(x_{1i})}}{Var(x_{2i}) - \frac{Cov(x_{1i}, x_{2i})^2}{Var(x_{1i})}} \\ &= \frac{Cov(x_{1i}, x_{2i})}{Var(x_{1i})} \cdot \frac{Cov(x_{2i}, y_i | x_{1i})}{Var(x_{2i} | x_{1i})} \\ &= \frac{Cov(x_{1i}, x_{2i})}{Var(x_{1i})} \cdot \beta_{2i} \end{aligned}$$

468

469 Clearly, unless  $Cov(x_{1i}, x_{2i}) = 0$ ,  $\beta_{1i}$  could always be expressed as a function of  $\beta_{2i}$ , and  
 470 hence can never be independent of each other. The above derivations, therefore, prove  
 471 the necessity of using orthogonal vectors for meaningful signal decomposition.

472 Meanwhile, by setting  $Cov(x_{1i}, x_{2i}) = 0$ , and realizing that the LSE of  $\beta_{1i}$  in the  
 473 absence of  $x_{2i}$  from the regression model (1) (i.e. reduced to a simple linear model) is  
 474  $\beta'_{1i} = Cov(x_{1i}, y_i) / Var(x_{1i})$ , we could immediately have  $\beta'_{1i} = \beta_{1i}$ . Thus with  
 475 orthogonal  $x_{1i}$  and  $x_{2i}$ , estimations from a multiple linear model would be the same as  
 476 those univariately estimated from simple linear models.

477 We then show that the population-level correlation analyses of  $\beta_{1i}$  and  $\beta_{2i}$  derived  
 478 above provide meaningful statistical inferences of signal independence. For simplicity,  
 479 assume that we rewrite  $\beta_{2i}$ , the signal strength of model  $x_{2i}$ , into a sum of two  
 480 independent components, i.e.,  $\beta_{2i} = \beta'_{2i} + \gamma_i \beta_{1i}$  where  $\beta'_{2i}$  is independent of  $\beta_{1i}$ , i.e.,  
 481  $Cov(\beta'_{2i}, \beta_{1i}) = 0$ , and the parameter  $\gamma_i$  denotes the proportion of overlapped signals  
 482 with model  $x_{1i}$ , and is independent of  $\beta_{1i}$ , i.e.,  $Cov(\gamma, \beta_1) = 0$ . We then calculate the  
 483 population-level correlation of  $\beta_{1i}$  and  $\beta_{2i}$  as:

$$\begin{aligned}
 Cov(\beta_1, \beta_2) &= Cov(\beta_1, \beta'_2 + \gamma\beta_1) \\
 &= Cov(\beta_1, \beta'_2) + Cov(\beta_1, \gamma\beta_1) \\
 &= E(\gamma\beta_1^2) - E(\beta_1)E(\gamma\beta_1) \\
 484 &= E(\gamma\beta_1^2) - E(\gamma)E(\beta_1^2) + (E(\gamma)E(\beta_1^2) - E(\beta_1)E(\gamma)E(\beta_1)) \\
 &= Cov(\gamma, \beta_1^2) + E(\gamma)Var(\beta_1) \\
 &= E(\gamma)Var(\beta_1)
 \end{aligned}$$

485 which only equals 0 if either  $E(\gamma) = 0$ , i.e. the population mean signals of both models  
 486 are not a function of each other, or  $Var(\beta_1) = 0$ , i.e. one of the signals is invariant  
 487 across the population, and hence again is not dependent on each other. Either way, the  
 488 signals of both models are indeed independent, and thus  $Cov(\beta_1, \beta_2) = 0 \Leftrightarrow \beta_1 \perp \beta_2$ ,  
 489 where orthogonal decomposition at the individual level permits the expression

490  $Cov(\beta_1, \beta_2) = 0$ . In conclusion, this two-stage approach can be used for statistical  
491 inference concerning the signal dependence or independence of two signals.

492 To illustrate the above theoretical derivations, we conducted simulation analyses to  
493 evaluate three models, namely the “independent-signal model”, where each observed  
494 signal consists of two independent inputs ( $\beta_{1i} \perp \beta_{2i}$ , and hence  $Cov(\beta_1, \beta_2) = 0$ ), and  
495 two dependent-signal models, i.e. the ‘single signal model’ with  $\beta_{2i} = \gamma_i \beta_{1i}$  (assume  
496  $E(\gamma) > 0$ , and hence  $Cov(\beta_1, \beta_2) > 0$ ), and the ‘push-and-pull model’ with  $\beta_{2i} +$   
497  $\gamma_i \beta_{1i} = c_i$  (assume  $E(\gamma) > 0$ , and hence  $Cov(\beta_1, \beta_2) < 0$ ). For simplicity, the signal  
498 overlapping parameter  $\gamma_i$  was set as a constant (i.e. 0 for the independent-signal model  
499 and 1 in both dependent-signal models); the observed signals ( $y$  in equation 1) were  
500 simulated from  $[-2, -1, 0, 1, 2]$  to  $[2, 1, 0, 1, 2]$  with an increment of  $[0.2, 0.1, 0, 0, 0]$   
501 at each step, i.e.  $[-2, -1, 0, 1, 2], [-1.8, -0.9, 0, 1, 2], \dots, [1.8, 0.9, 0, 1, 2], [2, 1, 0, 1, 2]$ ;  
502 and the orthogonal vectors were fixed as  $x_{1i} = [2, 1, 0, 1, 2]$  and  $x_{2i} = [-2, -1, 0, 1,$   
503  $2]$ . Therefore, for the ‘single signal model’,  $y_i$  was directly set as the observed signals  
504 plus a random noise  $N(0,1)$ . For the ‘push-and-pull model’, at the  $i$ th simulation step,  
505 by setting  $c_i = 0.05 \times (i-1) + N(0,1)$ ,  $\beta_{1i} = c_i + N(0,1)$  and  $\beta_{2i} = 1 - c_i + N(0,1)$ , we  
506 could then simulate  $y_i = \beta_{1i} x_{1i} + \beta_{2i} x_{2i}$ . Clearly, at the population-level, we have  
507  $Cov(\beta_1, \beta_2) = E_i^2(c) - E_i(c^2) = -Var(c)$ , and hence  $\beta_1$  and  $\beta_2$  are dependent. For the  
508 ‘independent-signal model’, at the  $i$ th simulation, by setting  $c = 0.05 \times (i-1)$ ,  
509  $\beta_{1i} = c + N(0,1)$  and  $\beta_{2i} = 1 - c + N(0,1)$ , we could also simulate  $y_i = \beta_{1i} x_{1i} + \beta_{2i} x_{2i}$ ,  
510 where, however, one would expect  $Cov(\beta_1, \beta_2) = 0$ . It is notable that while the  
511 simulation models of ‘push-and-pull’ and ‘independent-signal’ are rather similar, they  
512 are fundamentally different. The reason lies in the fact that the constant  $c$  in the  
513 ‘independent-signal model’ is invariant across individuals and solely determined by the  
514 predefined form of observed signals, and hence the signal strengths  $\beta_{1i}$  and  $\beta_{2i}$  do  
515 not dependent on each other. However, in the ‘push-and-pull model’, the form of



516 observed signals only determined the expectation  $E_i(c)$ , and hence both  $\beta_{1i}$  and  $\beta_{2i}$   
517 are nevertheless the functions of  $c_i$  that varies across individuals, and thus are not  
518 independent.

519 For each model, we simulated with 1000 independent individuals for 1000 times,  
520 and the detailed results of the simulation are shown in Extended Data Fig. 1b and  
521 Extended Data Table 2.

### 522 **Functional connectivity (FC) based on resting-state fMRI data**

523 A total of 184 participants' preprocessed high-resolution (7T) resting-state fMRI  
524 data were collected from the Human Connectome Project (HCP) dataset <sup>21</sup>. Total FC  
525 (Pearson Correlation) from evaluation and readiness activation activations regions to  
526 the voxels in brainstem (Fig. 4A), which were masked with AAL3 atlas <sup>30</sup> and from  
527 VTA and SNc to the whole brain were examined respectively. A paired t-test was used  
528 to estimate which brain region had a stronger FC with the activation region. The  
529 similarity between patterns of activation and FC was represented by Pearson's  
530 correlation coefficient  $r$ . Considering the high correlation between voxels, the degree  
531 of freedom was adjusted according to the number of components which had over 95%  
532 interpretation of brain activation by principal component analysis.

### 533 **Measurement of modifying effects**

534 As N-shape and W-shape models can be considered as modifiers of evaluation and  
535 readiness models, respectively, their strength (i.e. the activation level) can be used to  
536 measure the deviance from the proposed model settings, i.e. the exact scale or the  
537 relative scale. Thus we computed the standardized mean  
538  $((t_{relative} + t_{exact})/\max(\text{abs}(t_{relative}), \text{abs}(t_{exact})))$  to evaluate the prevailing  
539 settings, where  $t_{relative}$  represents the t-statistics of the activation for N-shape or W-  
540 shape models under the relative-scale setting, and  $t_{exact}$  represents the t-statistics of  
541 the activation for N-shape or W-shape models under the relative-scale setting. When  
542 the observed signal falls somewhere between the relative-scale and exact-scale settings,  
543 it is readily observable that  $t_{relative}$  would be positive and  $t_{exact}$  would be negative.  
544 Therefore,  $\text{abs}(t_{relative}) > \text{abs}(t_{exact})$  would prefer the exact-scale setting, and the

545 standardized mean ranges from 0 to 1, whereas  $abs(t_{relative}) < abs(t_{exact})$  would  
546 prefer the relative-scale setting, and the standardized mean ranges from -1 to 0. It is  
547 notable that meaningful settings other than this may also be possible. For instance, the  
548 response of the small stimuli could be identical to the large stimuli in the observed  
549 signal, thus  $t_{exact} < t_{relative} < 0$ , and the standardized mean could be well smaller  
550 than -1.

### 551 **Weighted voxel co-activation network analysis (WVCNA)**

552 The R package WGCNA<sup>31</sup> was implemented to conduct the WVCNA<sup>32</sup>, which  
553 identifies activation modules of both evaluation and readiness models across the brain.  
554 The final dataset used for WVCNA included 1,912 participants with 3365 voxels for  
555 the evaluation model and 1900 participants with 10932 voxels for the readiness model  
556 after removing null data and outliers. We transferred most parameters as default settings  
557 from previous studies<sup>33</sup>, except for the soft-threshold parameters, which were set to  
558 seven based on the scale-free topology criteria (Fig. S5), incidentally identical to those  
559 estimated for the MID task from a different cohort<sup>33</sup>. The stabilities of the generated  
560 modules were assessed through bootstrapping.

### 561 **Canonical correlation analysis (CCA)**

562 CCA has been widely used to investigate the overall correlation between two sets  
563 of standardized variables<sup>34</sup>. Due to high intra-correlations in both brain networks and  
564 task performances, multicollinearity was a potential risk factor jeopardizing the validity  
565 of the subsequent statistical inference. Therefore, we adopted the CCA proposed in a  
566 previous reference<sup>33</sup>. Briefly, we used the eta square ( $\eta^2$ ) to represent the proportion of  
567 mutually explained variance between the two sets of variables. For each correlation, the  
568 *P* value or significance level was determined using the permutation test, where the  
569 individual IDs of task performances were randomly shuffled at each iteration to  
570 generate the null distribution of the corresponding test statistics. We further included  
571 an adjusted  $\eta^2$  to correct for the inflation in  $\eta^2$  caused by the increased number of  
572 variables as:

$$573 \quad \eta_{adj}^2 = 1 - \frac{1 - \eta^2}{1 - \eta_0^2}$$

574 where  $\eta_0^2$  represents the expected  $\eta^2$  under the null hypothesis that there is no  
575 relationship between the two sets of variables (that is, it acts as a measure of inflation  
576 in  $\eta^2$ ), and can be directly estimated through the permutation test. As the effect of one  
577 task performance was significant, we also estimated the effects of each component of  
578 the behavior with the significant levels at  $P < 0.05$ .

### 579 **Emotional faces task in the IMAGEN project**

580 Emotional face processing was investigated using the “emotional faces task” in  
581 the IMAGEN project <sup>26</sup>. Participants were exposed to a sequence of stimuli which  
582 consisted of short (2–5 s) black-and-white video clips showing male and female faces  
583 with varying facial expressions. Stimuli showed human faces which started with the  
584 expression of a neutral expression and then either turned angry/happy or displayed a  
585 neutral movement without a particular emotional content (for example, twitching the  
586 nose). Stimuli were arranged in 18 s blocks, each block including 4–7 video clips  
587 depicting faces of the same emotion or neutral. Altogether, there were 3 blocks of  
588 neutral faces and 3 blocks containing angry and happy faces respectively. In between 2  
589 blocks of face clips, an 18 s non-biological control video clip was presented. The control  
590 stimuli consisted of expanding and contracting black-and-white concentric circles of  
591 various contrasts, roughly matching the contrast and motion characteristics of the faces  
592 clips.

593 The recruitment procedures employed in the IMAGEN project and demographic  
594 information have been described previously <sup>26</sup>. The standard operating procedures for  
595 the IMAGEN project are available at [http://www.imagen-](http://www.imagen-europe.com/en/Publications_and_SOP.php)  
596 [europe.com/en/Publications\\_and\\_SOP.php](http://www.imagen-europe.com/en/Publications_and_SOP.php), which contain details on ethics,  
597 recruitment, neuropsychological tests and preprocessing protocols of MRI data. In brief,  
598 task-based functional MRI data were analyzed with SPM12 (Statistical Parametric  
599 Mapping, <http://www.fil.ion.ucl.ac.uk/spm>). Preprocessing included: slice time  
600 correction to adjust for time differences due to multi-slice imaging acquisition,  
601 realignment to the first volume in line, non-linearly warping to the MNI space (based  
602 on a custom EPI template (53x63x46 voxels) created out of an average of the mean

603 images of 400 adolescents), resampling at a resolution of  $3 \times 3 \times 3 \text{mm}^3$  and smoothing  
604 with an isotropic Gaussian kernel of 5 mm full-width at half-maximum. And the  
605 activations of each task condition, i.e. happy, angry, neutral faces and control stimuli,  
606 were evaluated for each individual at the first-level analysis (The details can be found  
607 at [https://github.com/imagen2/imagen\\_processing](https://github.com/imagen2/imagen_processing)). And these results were conducted  
608 for the further DeCoP analysis.

#### 609 **Data availability**

610 ABCD data are available from a dedicated database: <https://abcdstudy.org>. Human  
611 Connectome Projects data are available from: <https://www.humanconnectome.org>. The  
612 IMAGEN project are available from a dedicated database: <https://imagen2.cea.fr>.

#### 613 **Code availability**

614 Custom code that supports the findings of this study is available from the  
615 corresponding author upon request. All data needed to evaluate the conclusions in the  
616 paper are present in the paper and/or the Supplementary Information. Additional data  
617 related to this paper may be requested from the authors.

618

619 **Methods Reference**

- 620 29 Knutson, B., Westdorp, A., Kaiser, E. & Hommer, D. FMRI Visualization of  
621 Brain Activity during a Monetary Incentive Delay Task. *NeuroImage* **12**, 20-27,  
622 doi:10.1006/nimg.2000.0593 (2000).
- 623 30 Rolls, E. T., Huang, C. C., Lin, C. P., Feng, J. & Joliot, M. Automated  
624 anatomical labelling atlas 3. *Neuroimage* **206**, 116189,  
625 doi:10.1016/j.neuroimage.2019.116189 (2020).
- 626 31 Langfelder, P. & Horvath, S. WGCNA: an R package for weighted correlation  
627 network analysis. *BMC Bioinformatics* **9**, 559, doi:10.1186/1471-2105-9-559  
628 (2008).
- 629 32 Mumford, J. A. *et al.* Detecting network modules in fMRI time series: a  
630 weighted network analysis approach. *Neuroimage* **52**, 1465-1476,  
631 doi:10.1016/j.neuroimage.2010.05.047 (2010).
- 632 33 Jia, T. *et al.* Neurobehavioural characterisation and stratification of  
633 reinforcement-related behaviour. *Nat Hum Behav* **4**, 544-558,  
634 doi:10.1038/s41562-020-0846-5 (2020).
- 635 34 Combes, S. *et al.* Relationships between sensory and physicochemical  
636 measurements in meat of rabbit from three different breeding systems using  
637 canonical correlation analysis. *Meat Sci* **80**, 835-841,  
638 doi:10.1016/j.meatsci.2008.03.033 (2008).

639

640 **Acknowledgments**

641 This work received support from the following sources: National Key Research  
642 and Development Program of China (No. 2019YFA0709502 and No.  
643 2018YFC1312900), the National Natural Science Foundation of China (No. 91630314  
644 and No 81801773), the 111 Project (B18015), the Key Project of Shanghai Science  
645 & Technology Innovation Plan(16JC1420402), Shanghai Municipal Science and  
646 Technology Major Project (2018SHZDZX01) and Zhangjiang Lab and the Shanghai  
647 Pujiang Project (No. 18PJ1400900). The funders had no role in study design, data  
648 collection and analysis, decision to publish or preparation of the manuscript.

649 **Author Contributions:**

650 Conception or Design of the Study: T.J., T.W.R. and J.F.. Manuscript Writing and  
651 Editing: S.X. and T.J. wrote the manuscript; T.W.R. and J.F. edited the first draft; all  
652 authors critically reviewed the manuscript. Imaging Data Preprocessing: S.X., C.X. and  
653 W.C.. Visualization: S.X., C.X. and T.J.. Data Analysis: S.X., C.X., Z.Z., J.K. and G.S.  
654 conducted all the statistical analyses, under the instruction of T.J. and J.F.. Results  
655 Interpretation: T.J., T.W.R. and J.F.. Supervision of the Study: T.J. and J.F.. Funding  
656 Acquisition: T.J. and J.F..

657 **Competing Interests:**

658 The authors declare no competing interests.

659 **Additional Information**

660 Supplementary Information is available for this paper.

661

662 **Extended Data figures and tables**

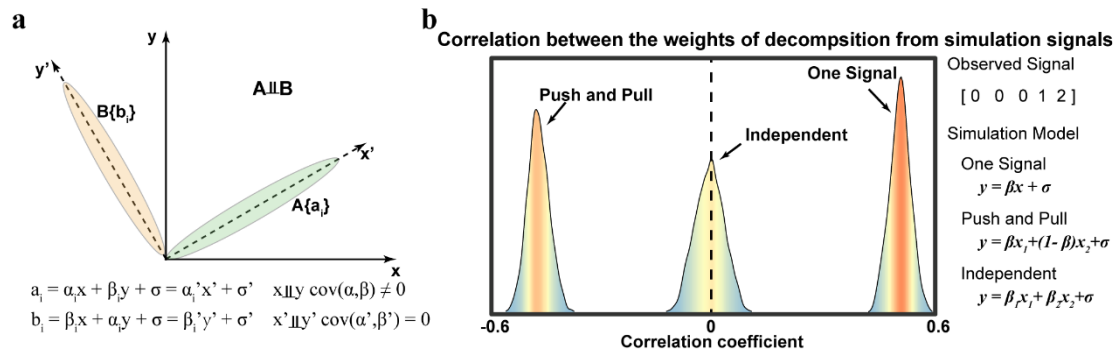

663

664 **Extended Data Fig. 1. a.** Only the “correct” orthogonal vectors could retrieve latent

665 independent signals. **d.** Correlations between decomposed signals based on different

666 simulation models. Also see Extended Data Table 2.

667



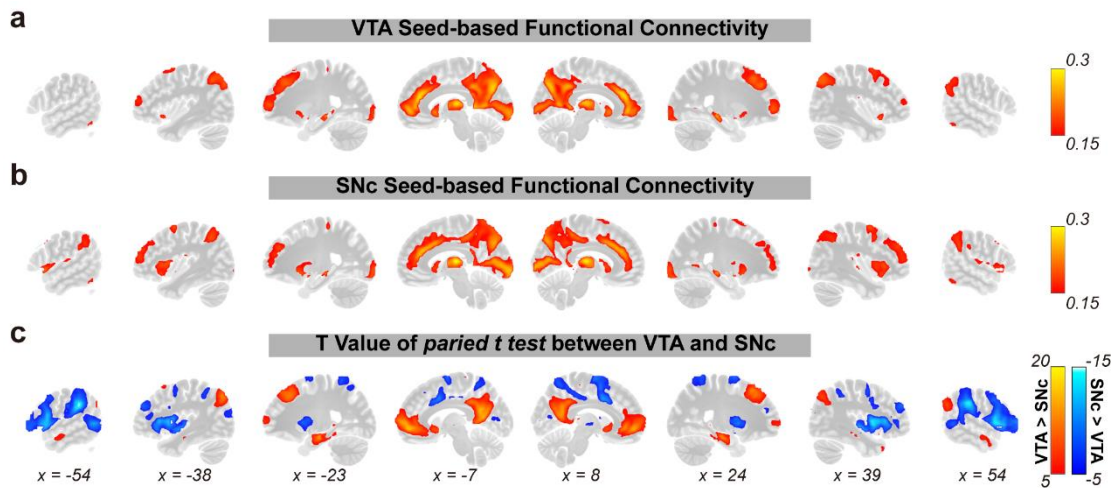

668

669

670

671

672

**Extended Data Fig. 2** The brain-wide patterns of seed-based functional connectivity (FC) strength from regions of interest (ROIs): **a.** VTA seed-based; **b.** SNc seed-based; **c.** The T-map of the differences between seed-based FCs patterns from VTA and SNc.

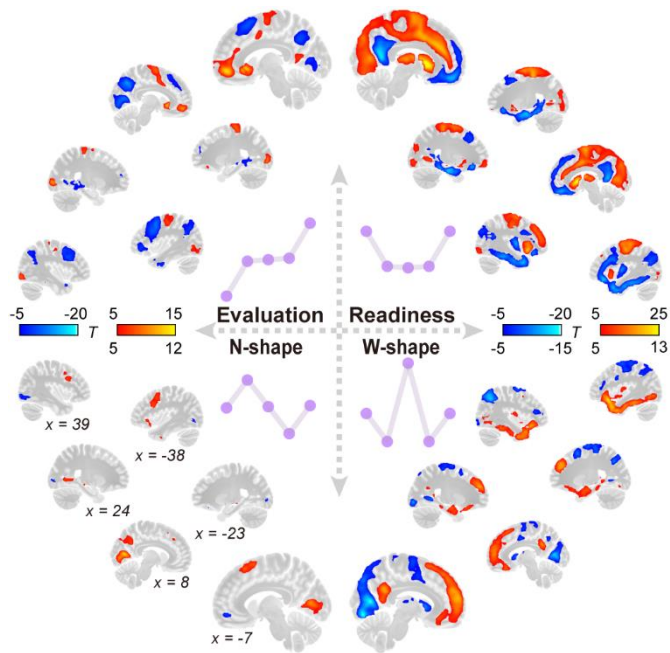

673

674 **Extended Data Fig. 3** Brain-wide neural representations of signal decomposition with

675 the exact-scale setting (e.g. the evaluation contrast takes the form [-5, -0.2, 0, 0.2, 5]

676 from large-loss to large-win, consistent with the parametric nature of the exact

677 monetary magnitude in the experimental design).

678

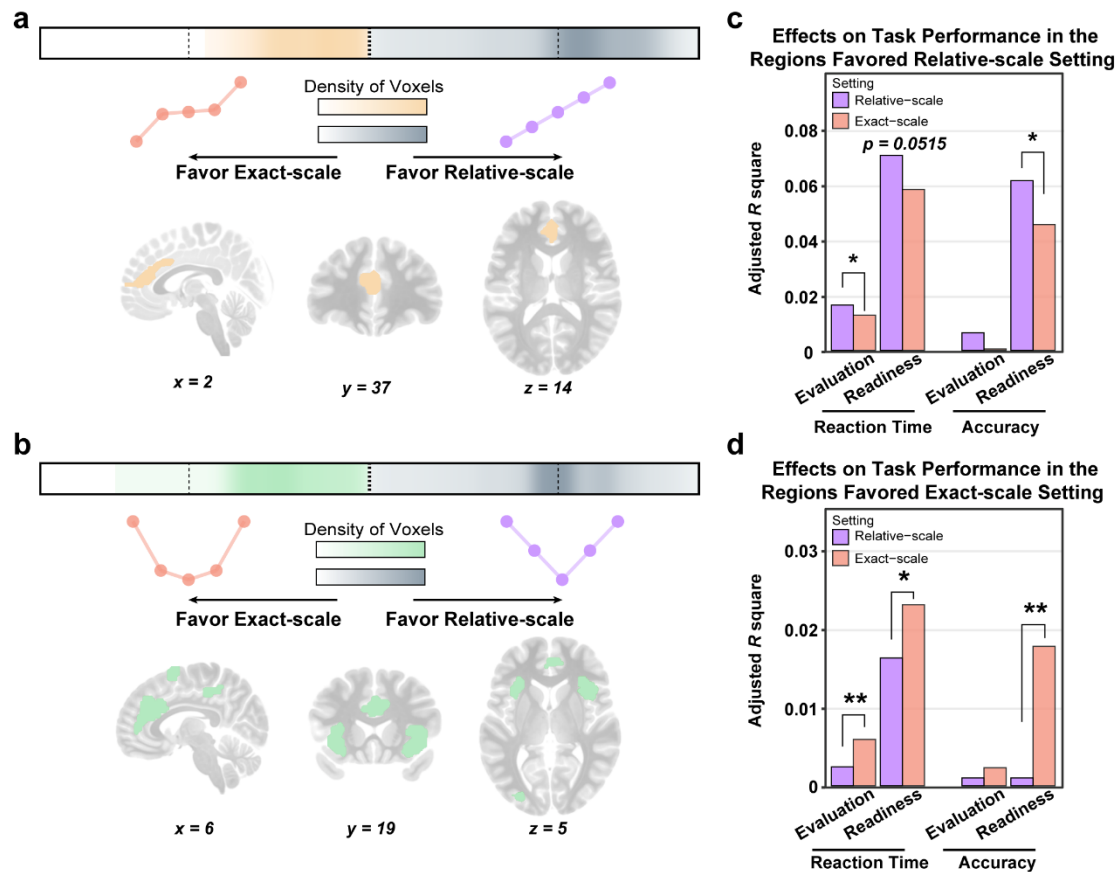

679

680

681

682

683

684

685

686

**Extended Data Fig. 4** The bimodal distribution of voxels favoring the exact-scale or relative-scale settings in evaluation (a) and readiness (b) processing. The typical regions favoring the exact-scale setting were illustrated in the corresponding lower subplots. c&d. The favored neural representations (i.e. relative-scale vs exact-scale) demonstrated better predictions for task performance. \*significant at level 0.05, \*\* significant at level 0.01.

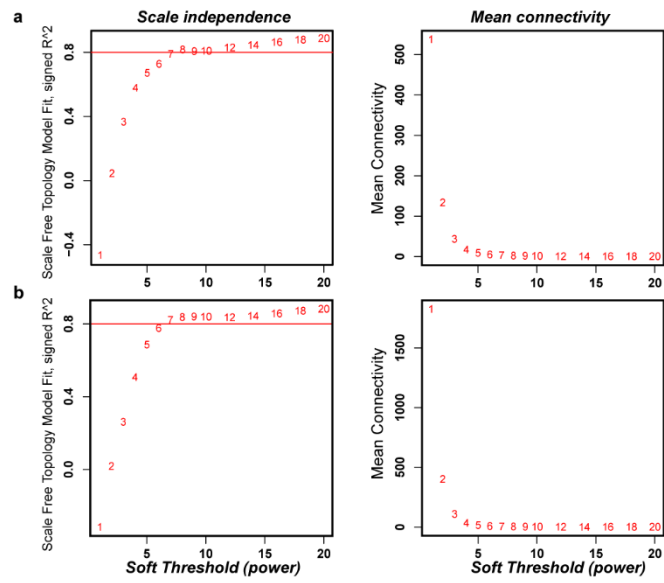

687

688

**Extended Data Fig.5** Plots of soft-threshold for WVCNA.

689

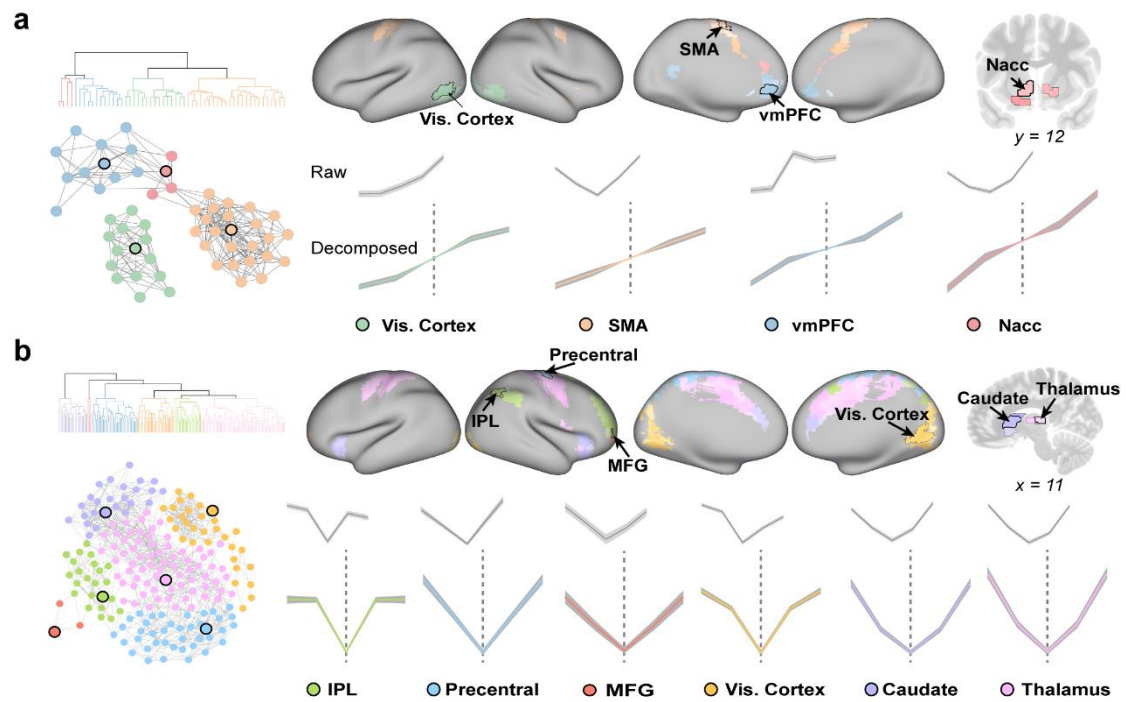

690

691

692

693

694

695

696

**Extended Data Fig. 6** The brain clusters and subnetworks of evaluation (a) and readiness (b) processing. Also see Extended Data Table 3. The core brain region of each subnetwork is marked by a black bound and illustrated in both the networks (left) and brain templates (right). Raw and decomposed signals of the core brain regions are presented below the brain.

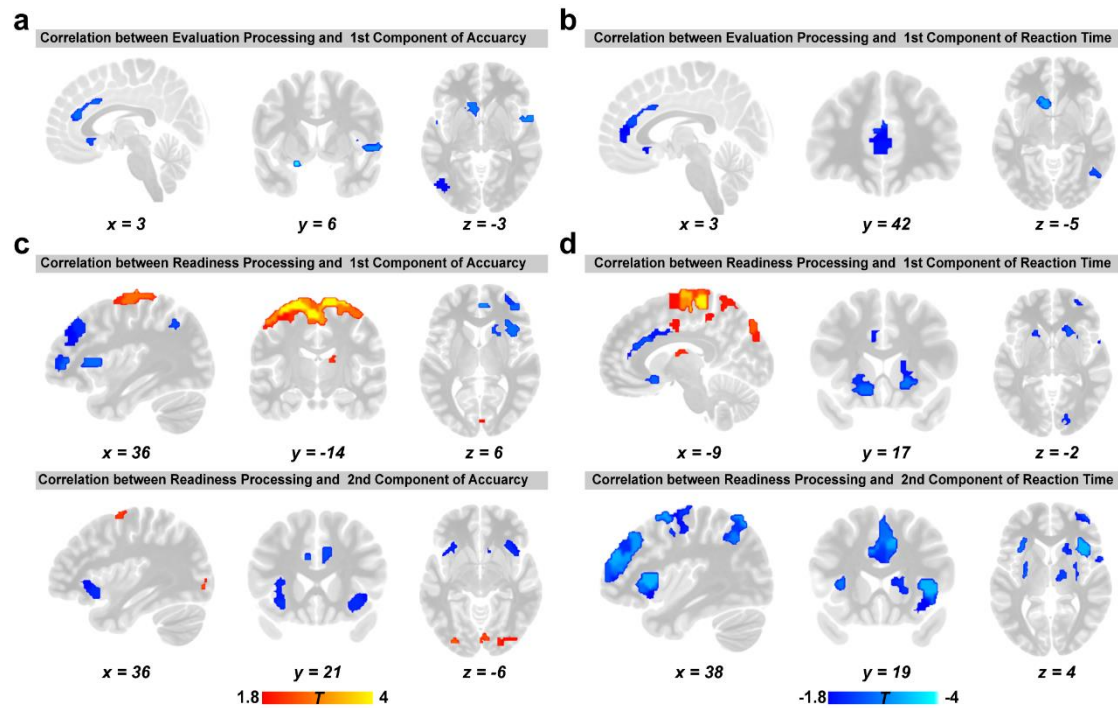

697

698 **Extended Data Fig. 7** The T-maps of evaluation and readiness processing's impacts  
699 on the task performances. The canonical correlation analysis (CCA) was implemented  
700 to further segregate signal components that demonstrated differential associations with  
701 task performances under different experimental conditions.

702

703 **Extended Data Table 1** Demographic characteristics of the samples in this study.

| Characteristics | Total (n=1939) | Site1 (n= 415)               | Site2 (n= 362)              | Site3 (n= 396)             | Site4 (n= 766)               |
|-----------------|----------------|------------------------------|-----------------------------|----------------------------|------------------------------|
| Gender (male)   | 984 (50.75%)   | 219 (52.77%)                 | 169 (46.69%)                | 191 (48.23%)               | 405 (52.87%)                 |
| Race/ethnicity  |                |                              |                             |                            |                              |
| White           | 1473 (75.97%)  | 282 (67.95% <sup>***</sup> ) | 246 (67.96% <sup>**</sup> ) | 313 (79.04%)               | 632 (82.51% <sup>***</sup> ) |
| Black           | 39 (2.01%)     | 3 (0.72%)                    | 10 (2.76%)                  | 18 (4.55% <sup>**</sup> )  | 8 (1.04%)                    |
| Hispanic        | 233 (12.02%)   | 84 (20.24% <sup>***</sup> )  | 52 (14.36%)                 | 24 (6.06% <sup>***</sup> ) | 73 (9.53%)                   |
| Asian           | 20 (1.03%)     | 2 (0.48%)                    | 13 (3.59% <sup>***</sup> )  | 4 (1.01%)                  | 1 (0.13% <sup>*</sup> )      |
| Other/Missing   | 174 (8.97%)    | 44 (10.6%)                   | 41 (11.33%)                 | 37 (9.34%)                 | 52 (6.79%)                   |

Superscripted \* means the variable differ significantly from the total population on the corresponding variable. \* p < 0.05, \*\* p < 0.01, \*\*\* p < 0.001 by Fisher's Exact Tests.

704



705 **Extended Data Table 2** Simulation results of the correlations between the weights of  
 706 decomposition.

| Observerd<br>Signals | One Signal Model |                         |                          | Push and Pull Model |                         |                          | Independent Model |                         |                          |
|----------------------|------------------|-------------------------|--------------------------|---------------------|-------------------------|--------------------------|-------------------|-------------------------|--------------------------|
|                      | <i>r</i>         | <i>T</i><br>(Readiness) | <i>T</i><br>(Evaluation) | <i>r</i>            | <i>T</i><br>(Readiness) | <i>T</i><br>(Evaluation) | <i>r</i>          | <i>T</i><br>(Readiness) | <i>T</i><br>(Evaluation) |
| 2 1 0 1 2            | -0.001           | 30.232                  | 0.032                    | -0.448              | 21.868                  | 0.024                    | 0.010             | 30.185                  | 0.025                    |
| 1.8 0.9 0 1 2        | 0.080            | 30.033                  | 2.669                    | -0.449              | 20.768                  | 1.033                    | 0.000             | 28.696                  | 1.353                    |
| 1.6 0.8 0 1 2        | 0.155            | 29.875                  | 5.245                    | -0.449              | 19.667                  | 2.086                    | 0.000             | 27.154                  | 2.751                    |
| 1.4 0.7 0 1 2        | 0.230            | 29.652                  | 7.735                    | -0.449              | 18.620                  | 3.113                    | -0.002            | 25.624                  | 4.087                    |
| 1.2 0.6 0 1 2        | 0.296            | 29.433                  | 10.073                   | -0.449              | 17.437                  | 4.138                    | 0.000             | 24.137                  | 5.484                    |
| 1 0.5 0 1 2          | 0.355            | 29.158                  | 12.230                   | -0.450              | 16.356                  | 5.174                    | -0.001            | 22.665                  | 6.785                    |
| 0.8 0.4 0 1 2        | 0.410            | 28.779                  | 14.196                   | -0.449              | 15.333                  | 6.195                    | 0.001             | 21.067                  | 8.178                    |
| 0.6 0.3 0 1 2        | 0.454            | 28.442                  | 15.998                   | -0.450              | 14.230                  | 7.275                    | -0.002            | 19.631                  | 9.527                    |
| 0.4 0.2 0 1 2        | 0.492            | 28.067                  | 17.658                   | -0.449              | 13.133                  | 8.253                    | -0.001            | 18.060                  | 10.893                   |
| 0.2 0.1 0 1 2        | 0.522            | 27.449                  | 19.051                   | -0.449              | 12.062                  | 9.255                    | 0.000             | 16.603                  | 12.216                   |
| 0 0 0 1 2            | 0.542            | 26.735                  | 20.315                   | -0.450              | 10.937                  | 10.321                   | 0.001             | 15.109                  | 13.553                   |
| -0.2 -0.1 0 1 2      | 0.555            | 25.962                  | 21.468                   | -0.449              | 9.817                   | 11.328                   | 0.000             | 13.565                  | 14.977                   |
| -0.4 -0.2 0 1 2      | 0.555            | 24.847                  | 22.457                   | -0.451              | 8.789                   | 12.310                   | 0.000             | 12.072                  | 16.320                   |
| -0.6 -0.3 0 1 2      | 0.547            | 23.471                  | 23.307                   | -0.450              | 7.645                   | 13.390                   | -0.001            | 10.559                  | 17.724                   |
| -0.8 -0.4 0 1 2      | 0.523            | 21.816                  | 24.111                   | -0.449              | 6.563                   | 14.409                   | -0.001            | 9.154                   | 19.057                   |
| -1 -0.5 0 1 2        | 0.485            | 19.635                  | 24.733                   | -0.450              | 5.440                   | 15.470                   | 0.001             | 7.570                   | 20.393                   |
| -1.2 -0.6 0 1 2      | 0.429            | 16.942                  | 25.369                   | -0.450              | 4.382                   | 16.495                   | 0.001             | 6.033                   | 21.723                   |
| -1.4 -0.7 0 1 2      | 0.351            | 13.595                  | 25.931                   | -0.450              | 3.230                   | 17.528                   | -0.001            | 4.541                   | 23.125                   |
| -1.6 -0.8 0 1 2      | 0.252            | 9.561                   | 26.360                   | -0.448              | 2.225                   | 18.543                   | -0.001            | 3.031                   | 24.491                   |
| -1.8 -0.9 0 1 2      | 0.132            | 4.959                   | 26.780                   | -0.449              | 1.097                   | 19.576                   | 0.000             | 1.490                   | 25.792                   |
| -2 -1 0 1 2          | 0.001            | 0.014                   | 27.205                   | -0.449              | -0.028                  | 20.638                   | -0.001            | 0.000                   | 27.234                   |

707

708 **Extended Data Table 3** Coincidence degree of both evaluation and readiness  
 709 processing for the task performance under the different model settings.

| Models                                                                                                                                                         |                              | Reaction Time       |               |                              |                    | Accuracy            |               |                              |                    |
|----------------------------------------------------------------------------------------------------------------------------------------------------------------|------------------------------|---------------------|---------------|------------------------------|--------------------|---------------------|---------------|------------------------------|--------------------|
|                                                                                                                                                                |                              | Adj. R <sup>2</sup> | P             | Adj. R <sup>2</sup><br>diff. | P <sub>adj.*</sub> | Adj. R <sup>2</sup> | P             | Adj. R <sup>2</sup><br>diff. | P <sub>adj.*</sub> |
| <i>All Modules</i>                                                                                                                                             |                              |                     |               |                              |                    |                     |               |                              |                    |
| Relative-scale Models                                                                                                                                          | Readiness (control W-shape)  | <b>0.0849</b>       | <b>0.0000</b> | <b>0.0119</b>                | <b>0.0476</b>      | <b>0.0617</b>       | <b>0.0000</b> | 0.0123                       | 0.0506             |
|                                                                                                                                                                | Evaluation (control N-shape) | <b>0.0252</b>       | <b>0.0138</b> | 0.0087                       | 0.0646             | 0.0055              | 0.1607        | 0.0044                       | 0.0577             |
| Exact-scale Models                                                                                                                                             | Readiness (control W-shape)  | <b>0.0730</b>       | <b>0.0000</b> |                              |                    | <b>0.0494</b>       | <b>0.0000</b> |                              |                    |
|                                                                                                                                                                | Evaluation (control N-shape) | <b>0.0165</b>       | <b>0.0044</b> |                              |                    | 0.0011              | 0.5570        |                              |                    |
| <i>Modules Favored Relative-scale Models</i>                                                                                                                   |                              |                     |               |                              |                    |                     |               |                              |                    |
| Relative-scale Models                                                                                                                                          | Readiness (control W-shape)  | <b>0.0706</b>       | <b>0.0000</b> | <b>0.0124</b>                | <b>0.0349</b>      | <b>0.0614</b>       | <b>0.0000</b> | <b>0.0159</b>                | <b>0.0196</b>      |
|                                                                                                                                                                | Evaluation (control N-shape) | <b>0.0164</b>       | <b>0.0037</b> | 0.0037                       | 0.0515             | 0.0063              | 0.1245        | <b>0.0058</b>                | <b>0.0360</b>      |
| Exact-scale Models                                                                                                                                             | Readiness (control W-shape)  | <b>0.0582</b>       | <b>0.0000</b> |                              |                    | <b>0.0455</b>       | <b>0.0000</b> |                              |                    |
|                                                                                                                                                                | Evaluation (control N-shape) | <b>0.0127</b>       | <b>0.0080</b> |                              |                    | 0.0005              | 0.4398        |                              |                    |
| <i>Modules Favored Exact-scale Models</i>                                                                                                                      |                              |                     |               |                              |                    |                     |               |                              |                    |
| Relative-scale Models                                                                                                                                          | Readiness (control W-shape)  | <b>0.0163</b>       | <b>0.0004</b> | <b>-0.0068</b>               | <b>0.0463</b>      | 0.0010              | 0.3637        | <b>-0.0168</b>               | <b>0.0021</b>      |
|                                                                                                                                                                | Evaluation (control N-shape) | <b>0.0024</b>       | <b>0.0108</b> | <b>-0.0035</b>               | <b>0.0073</b>      | 0.0010              | 0.0949        | -0.0013                      | 0.1645             |
| Exact-scale Models                                                                                                                                             | Readiness (control W-shape)  | <b>0.0231</b>       | <b>0.0000</b> |                              |                    | <b>0.0178</b>       | <b>0.0002</b> |                              |                    |
|                                                                                                                                                                | Evaluation (control N-shape) | <b>0.0059</b>       | <b>0.0041</b> |                              |                    | 0.0023              | 0.0767        |                              |                    |
| * Adjusted P values based on 10000 bootstrap; Adj. R <sup>2</sup> diff. The difference between the adjusted R square of relative-scale and exact-scale models. |                              |                     |               |                              |                    |                     |               |                              |                    |

710
